# Supplementary material for: Qiber3D—an open-source software package for the quantitative analysis of networks from 3D image stacks
Source: PubMed Central journal article supplement (PMC8848317; doi:10.1093/gigascience/giab091), 2022-02-04
Supplement: giab091_response_to_reviewer_comments_revision_1.pdf [file giab091_response_to_reviewer_comments_revision_1.pdf]

# Author's Response To Reviewer Comments

Close

The requested changes were made (reference included)

Close
